# Supplementary material for: ABT-737 promotes tBid mitochondrial accumulation to enhance TRAIL-induced apoptosis in glioblastoma cells
Source: PubMed Central journal article supplement — Cell Death Dis. 2012 Nov 29;3(11):e432–. doi: 10.1038/cddis.2012.163 (PMC3542599; doi:10.1038/cddis.2012.163), 2012-11-29
Supplement: cddis2012163x2.pdf [file cddis2012163x2.pdf]

|              | <b>p53 status</b> | <b>PTEN status</b> |
|--------------|-------------------|--------------------|
| <b>U87MG</b> | wt                | mutated            |
| <b>T98G</b>  | mutated           | wt                 |
| <b>A172</b>  | wt                | deleted            |
| <b>U118</b>  | mutated           | mutated            |
| <b>U138</b>  | mutated           | deleted            |

a

|         |            | TRAIL     |           |            |       |
|---------|------------|-----------|-----------|------------|-------|
|         |            | 2 (ng/ml) | 5 (ng/ml) | 10 (ng/ml) |       |
| ABT-737 | 2 $\mu$ M  | 0.127     | 0.265     | 0.461      | U87MG |
|         | 5 $\mu$ M  | 0.159     | 0.247     | 0.385      |       |
|         | 10 $\mu$ M | 0.099     | 0.181     | 0.301      |       |

  

|         |            | TRAIL     |           |            |        |
|---------|------------|-----------|-----------|------------|--------|
|         |            | 2 (ng/ml) | 5 (ng/ml) | 10 (ng/ml) |        |
| ABT-737 | 2 $\mu$ M  | 0.252     | 0.458     | 0.465      | U118MG |
|         | 5 $\mu$ M  | 0.154     | 0.185     | 0.161      |        |
|         | 10 $\mu$ M | 0.114     | 0.129     | 0.181      |        |

  

|         |            | TRAIL     |           |            |      |
|---------|------------|-----------|-----------|------------|------|
|         |            | 2 (ng/ml) | 5 (ng/ml) | 10 (ng/ml) |      |
| ABT-737 | 2 $\mu$ M  | 0.638     | 0.674     | 1.140      | A172 |
|         | 5 $\mu$ M  | 0.656     | 0.579     | 1.059      |      |
|         | 10 $\mu$ M | 0.349     | 0.558     | 1.021      |      |

  

|         |            | TRAIL     |           |            |      |
|---------|------------|-----------|-----------|------------|------|
|         |            | 2 (ng/ml) | 5 (ng/ml) | 10 (ng/ml) |      |
| ABT-737 | 2 $\mu$ M  | 1.437     | 0.722     | 1.093      | T98G |
|         | 5 $\mu$ M  | 0.610     | 0.538     | 0.868      |      |
|         | 10 $\mu$ M | 0.431     | 0.465     | 0.802      |      |

  

|         |            | TRAIL     |            |            |        |
|---------|------------|-----------|------------|------------|--------|
|         |            | 5 (ng/ml) | 10 (ng/ml) | 20 (ng/ml) |        |
| ABT-737 | 2 $\mu$ M  | 0.752     | 0.459      | 0.665      | U138MG |
|         | 5 $\mu$ M  | 0.194     | 0.155      | 0.171      |        |
|         | 10 $\mu$ M | 0.134     | 0.629      | 0.681      |        |

b

|         |            | TRAIL       |           |           |     |
|---------|------------|-------------|-----------|-----------|-----|
|         |            | 0.5 (ng/ml) | 1 (ng/ml) | 2 (ng/ml) |     |
| ABT-737 | 2 $\mu$ M  | 0.437       | 0.422     | 0.404     | GB1 |
|         | 5 $\mu$ M  | 0.532       | 0.483     | 0.372     |     |
|         | 10 $\mu$ M | 0.641       | 0.57      | 0.401     |     |

  

|         |            | TRAIL       |           |           |     |
|---------|------------|-------------|-----------|-----------|-----|
|         |            | 0.5 (ng/ml) | 1 (ng/ml) | 4 (ng/ml) |     |
| ABT-737 | 2 $\mu$ M  | 0.484       | 0.592     | 0.042     | GB2 |
|         | 5 $\mu$ M  | 1,046       | 0.480     | 0.023     |     |
|         | 10 $\mu$ M | 1,983       | 1,205     | 0.021     |     |
