# Supplementary figures and images for: ABT-737 promotes tBid mitochondrial accumulation to enhance TRAIL-induced apoptosis in glioblastoma cells
Source: PubMed Central journal article supplement — Cell Death Dis. 2012 Nov 29;3(11):e432–. doi: 10.1038/cddis.2012.163 (PMC3542599; doi:10.1038/cddis.2012.163), 2012-11-29

**a**

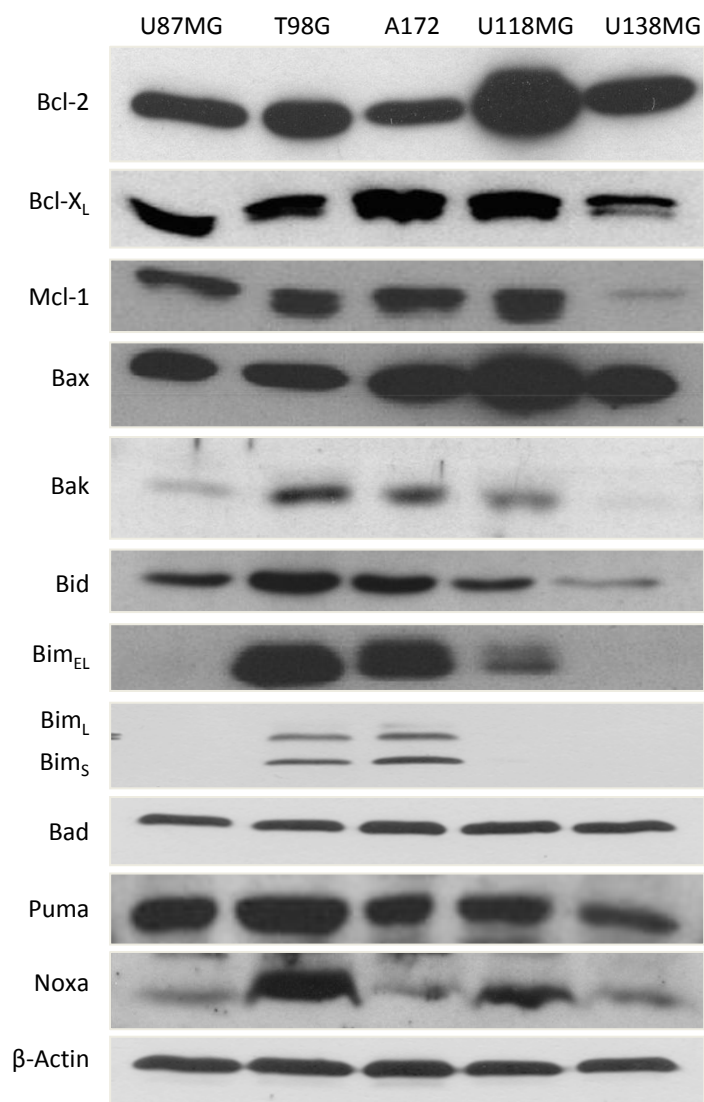

**b**

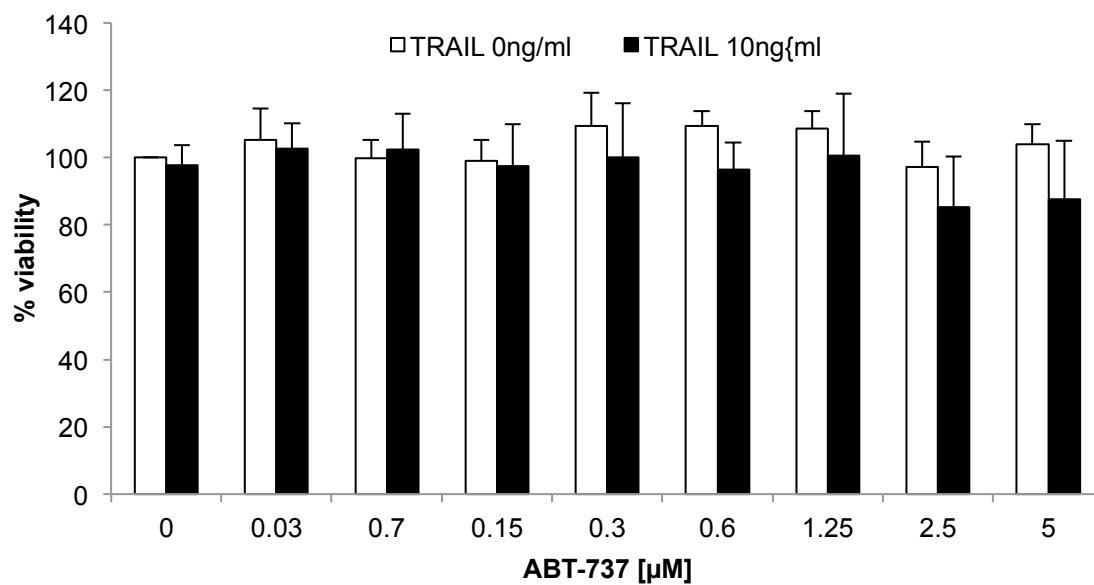



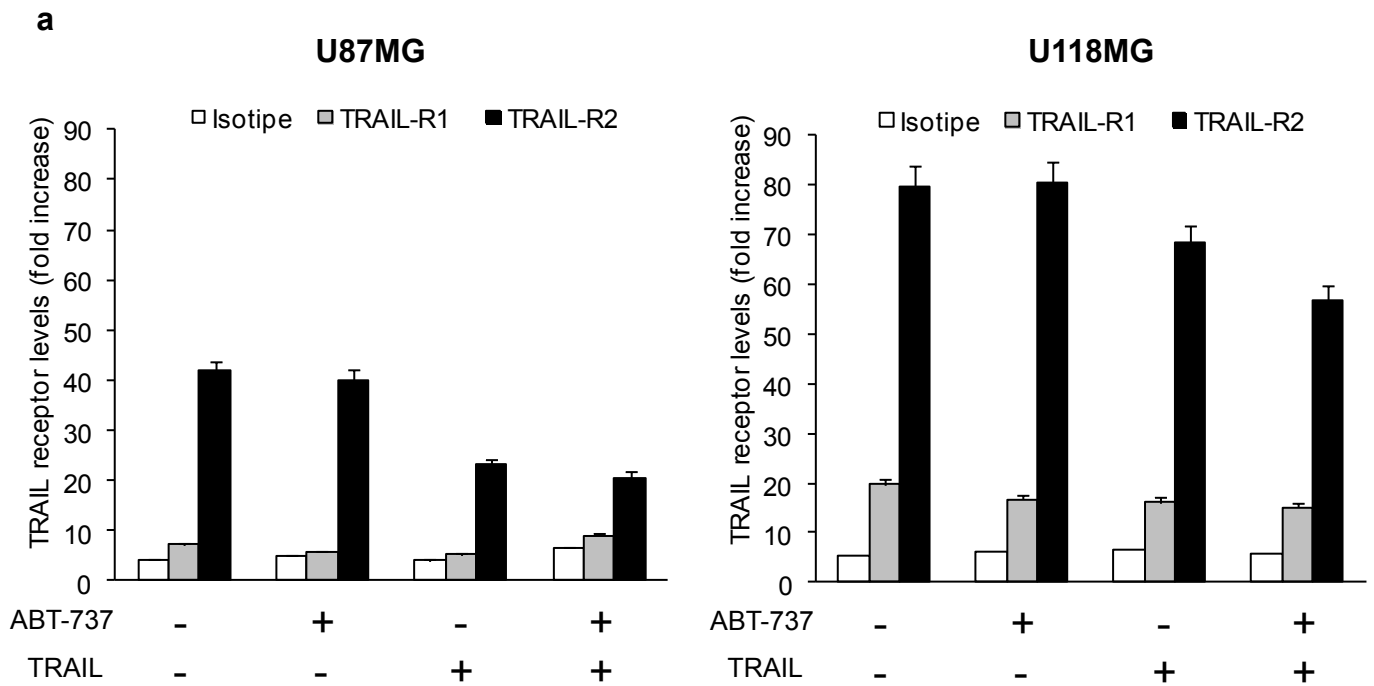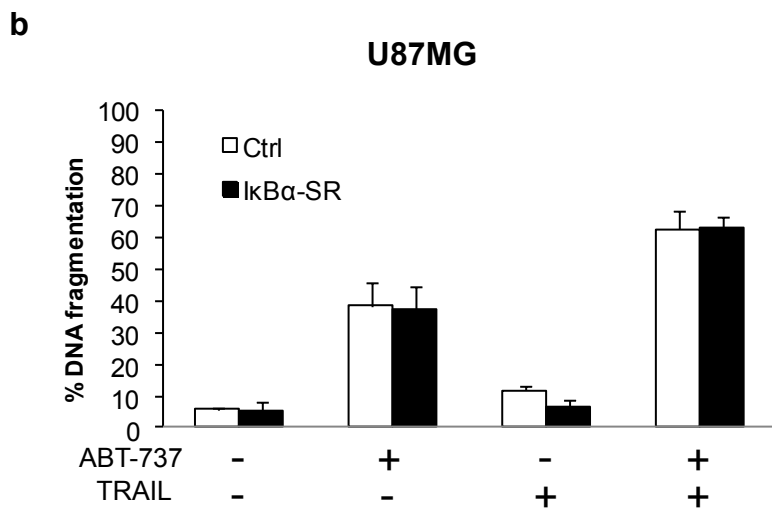

**c**

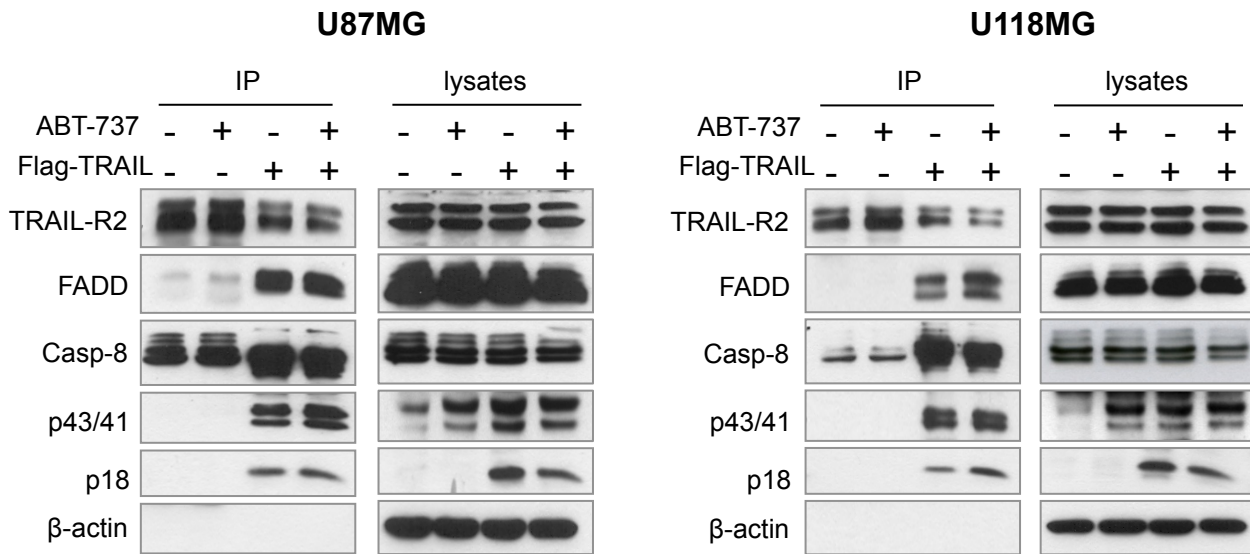

**d**

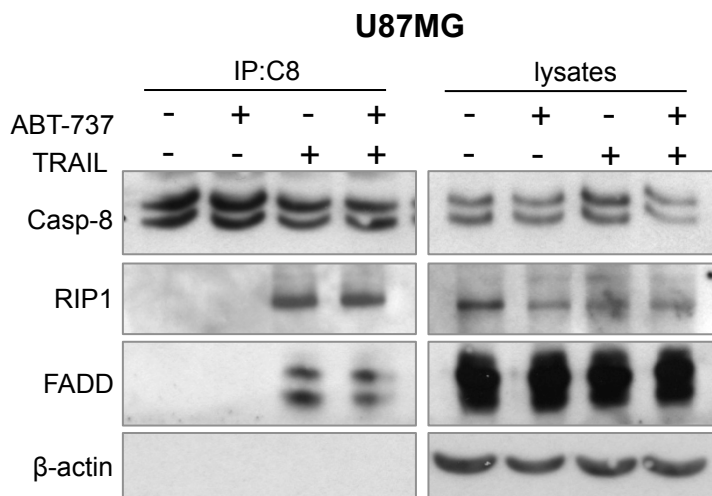

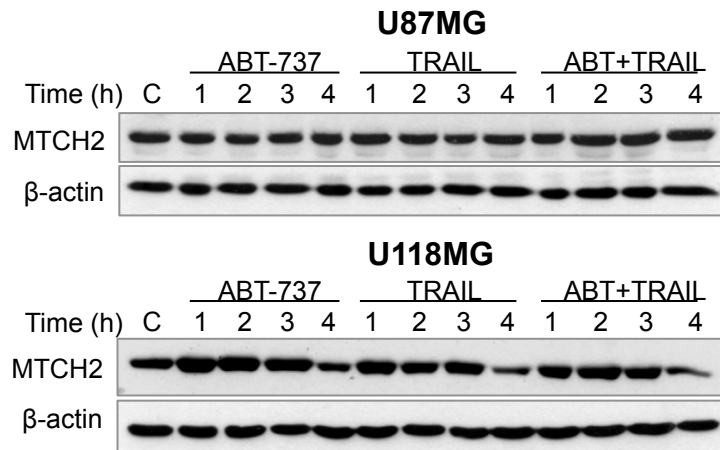

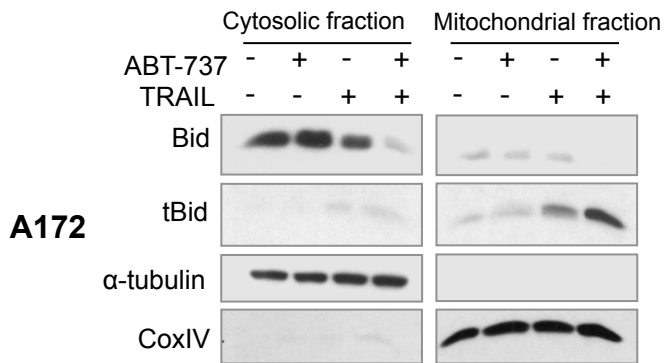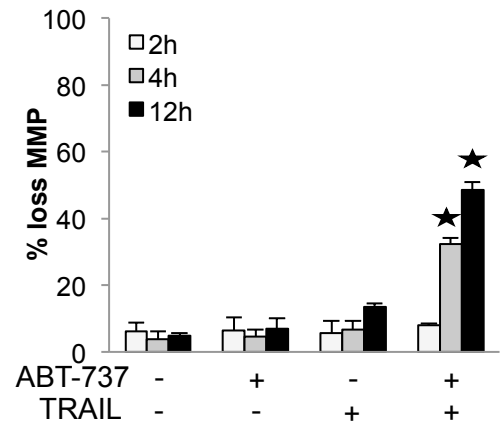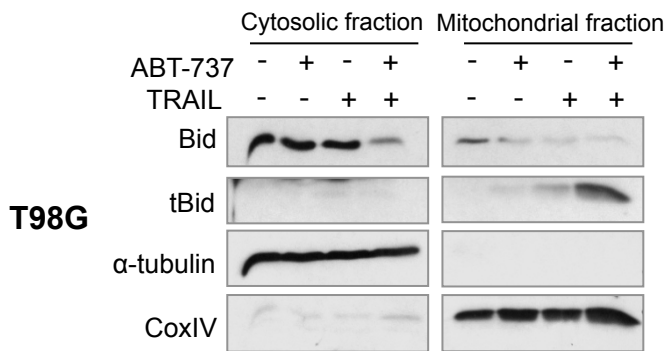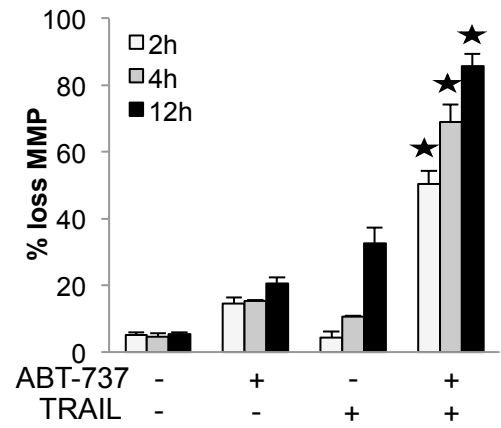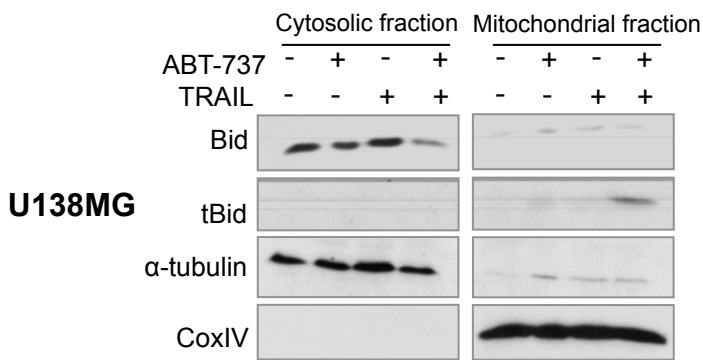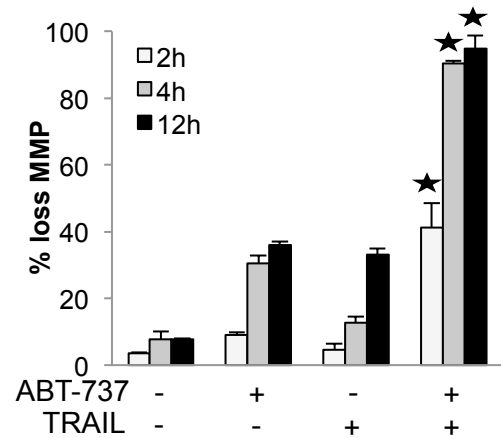

**a**

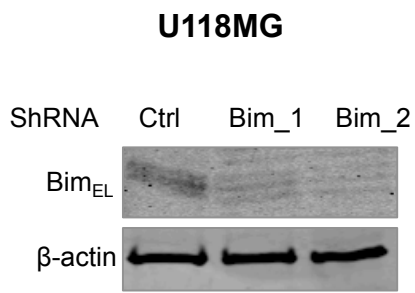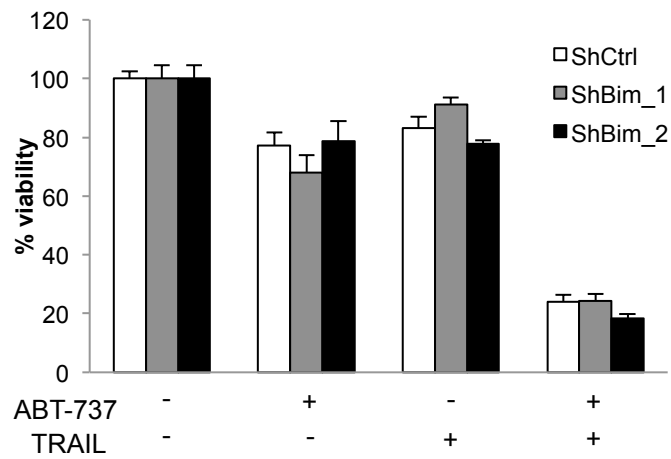

**b**

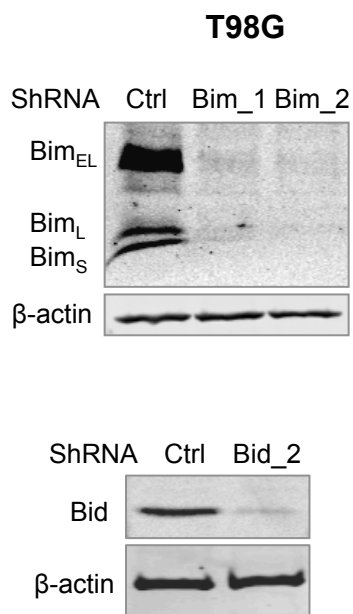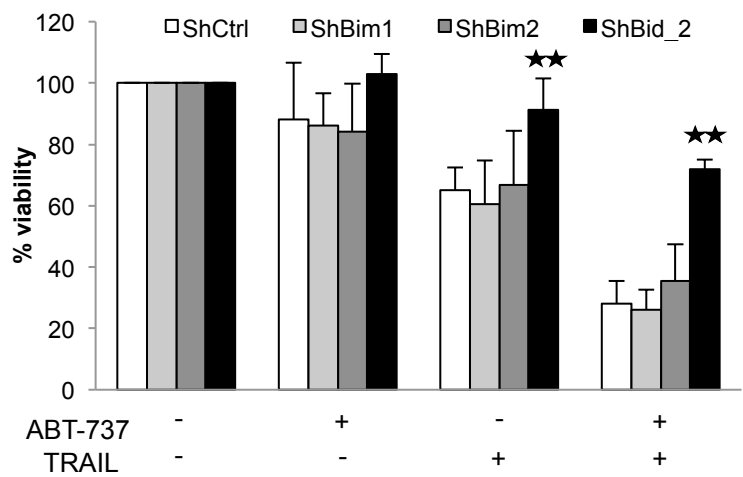

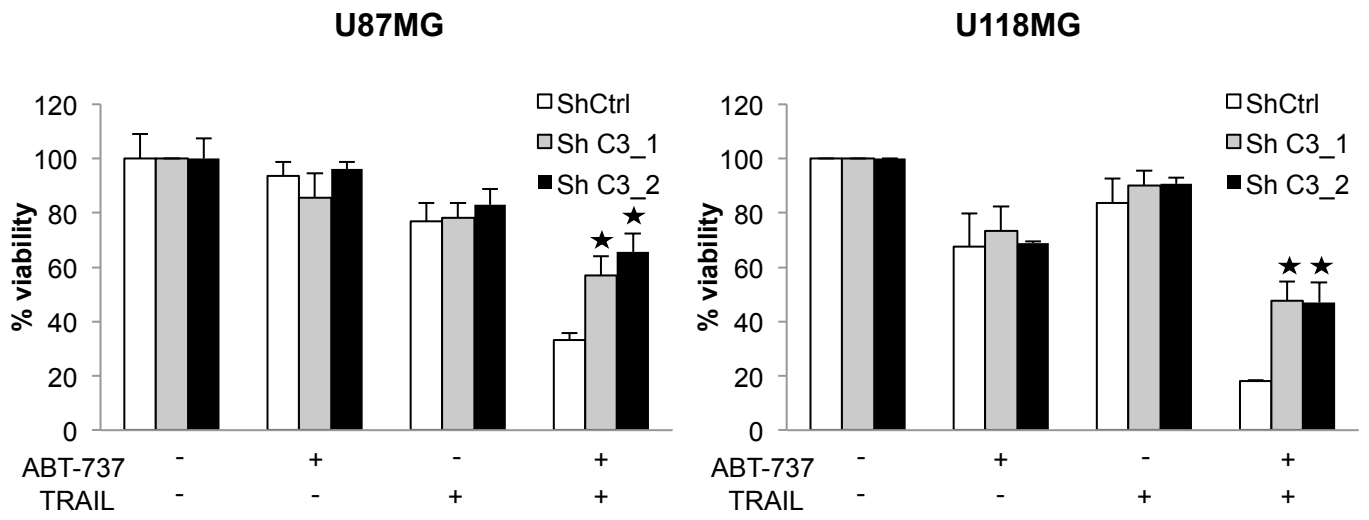



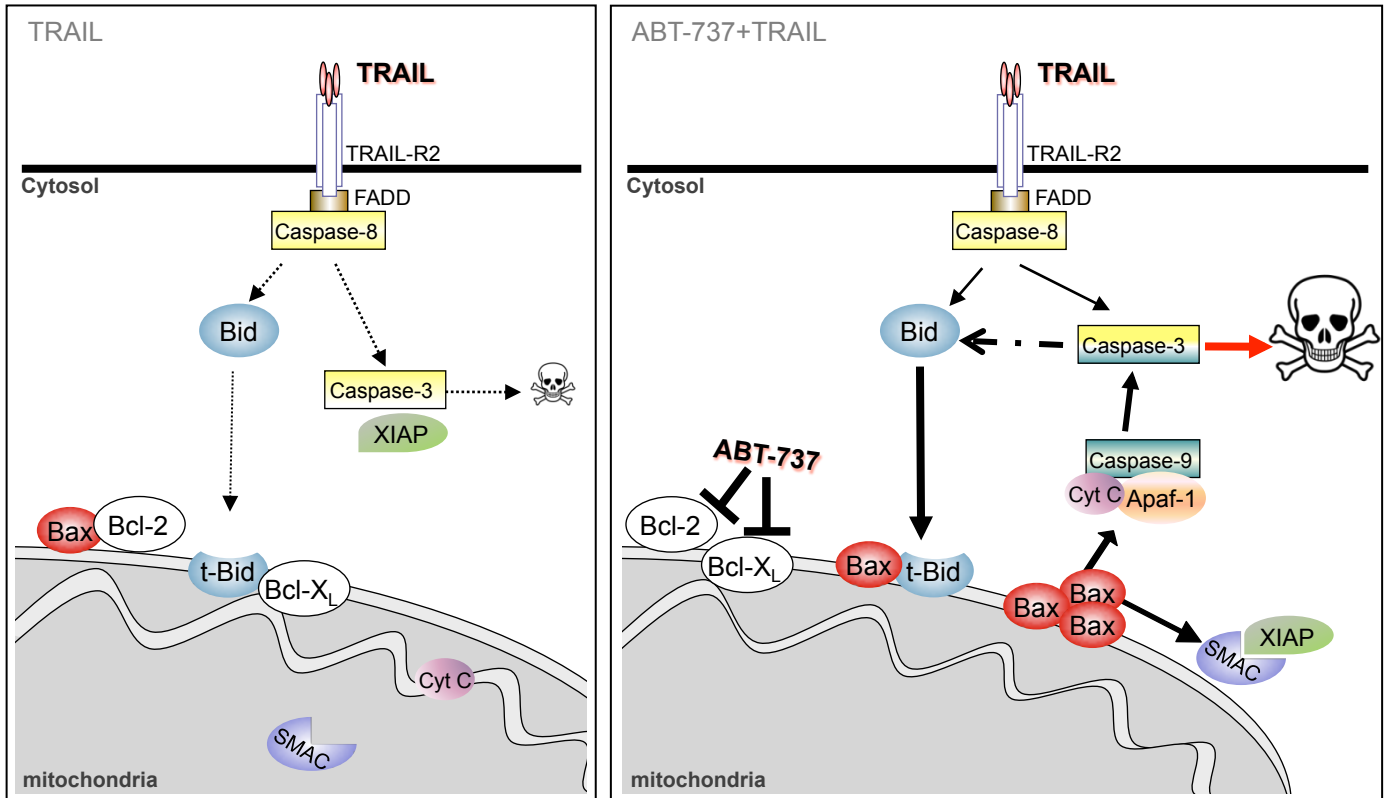

Supplement: cddis2012163x1.pdf [file cddis2012163x1.pdf]
